# Supplementary material
Source: publisher figshare collection journal article supplement (https://acs.figshare.com/ndownloader/files/3811672)
Supplement: Supplementary file 1 [file 3811672]

## Supporting information

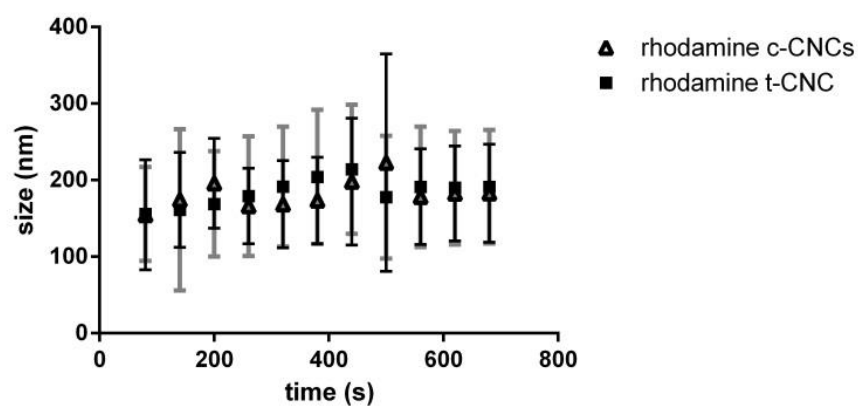

**Figure S1** Colloidal stability of rhodamine-CNC dispersions prepared by sonication in aqueous suspensions monitored by mean size analysis *via* single particle tracking over time. Triangles represent rhodamine-c-CNCs, squares rhodamine-t-CNCs.

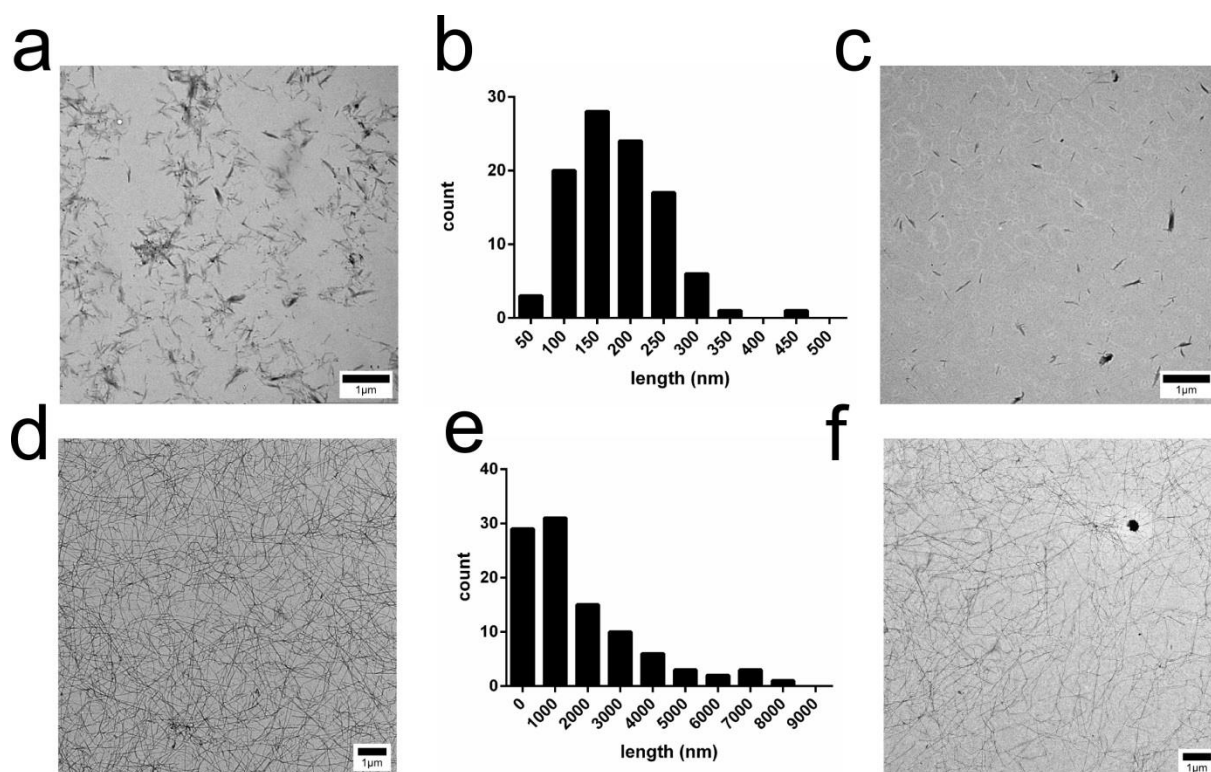

**Figure S2** TEM images of rhodamine-labeled CNCs nebulized with the ALICE system. Shown are TEM grids onto which  $0.56 \pm 0.25 \mu\text{g}/\text{cm}^2$  (a) and  $0.14 \pm 0.06 \mu\text{g}/\text{cm}^2$  (c) of rhodamine-c-CNCs or  $0.67 \pm 0.09 \mu\text{g}/\text{cm}^2$  (d) and  $0.13 \pm 0.04 \mu\text{g}/\text{cm}^2$  (f) of rhodamine-t-CNCs has been deposited. Histograms b (c-CNCs) and e (t-CNCs) show the length distribution after nebulization from 100 individual measurements. Scale bars represent  $1 \mu\text{m}$ .

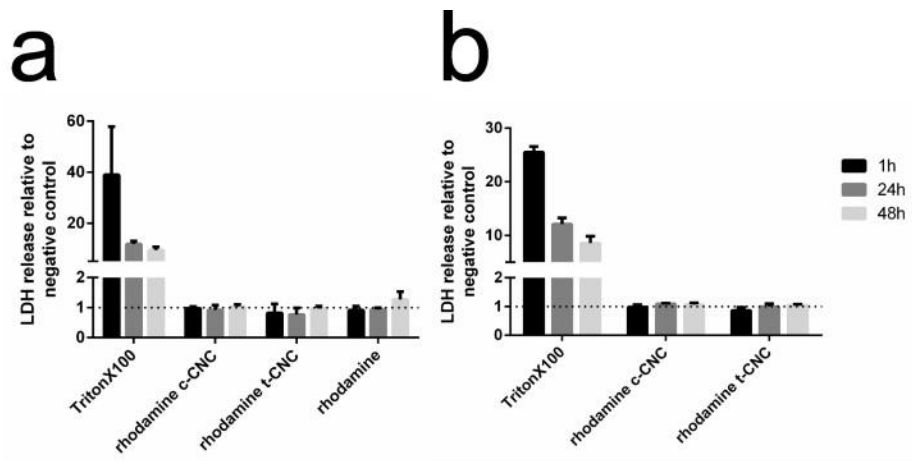

**Figure S3** LDH release measured from triple-cell co-cultures exposed to (a)  $\sim 0.62 \mu\text{g}/\text{cm}^2$  or (b)  $\sim 0.14 \mu\text{g}/\text{cm}^2$  rhodamine-CNCs. Results are presented relative to the negative control. TritonX<sub>100</sub> served as positive control.

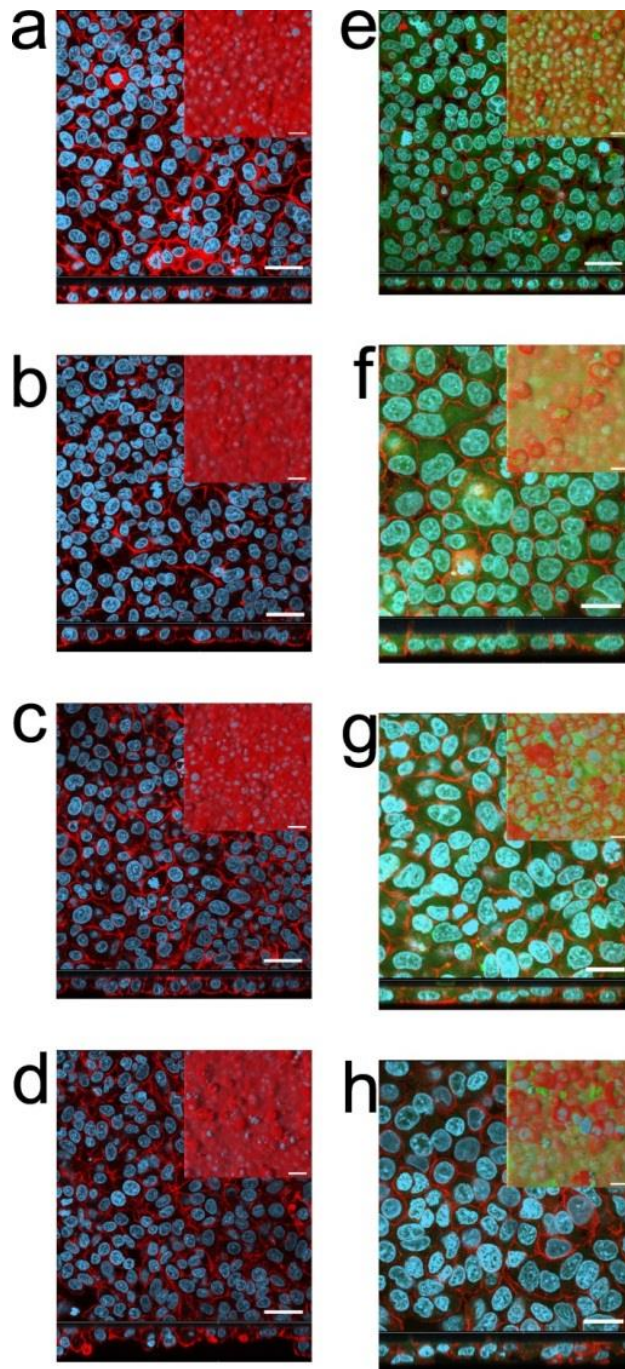

**Figure S4** Confocal laser scanning microscopy images of triple-cell co-culture model exposed to the negative control (NaCl) *via* the ALICE system. Co-cultures were either exposed to 500  $\mu$ M NaCl only (**a-d**) or 100  $\mu$ M rhodamine solution (**e-h**). Cells were immediately fixed (**a, e**) or after 1 (**b, f**), 24 (**c, g**) or 48 h (**d, h**) post-exposure and stained for cytoskeleton (red) and nuclei (cyan). Images are presented as surface rendering (insets) and xy/yz-projection of the z-stacks. Scale bar = 30  $\mu$ m.
